# Supplementary material
Source: PubMed Central journal article supplement (PMC3047289)
Supplement: supp_10-1243_Online_Supplement.pdf [file supp_10-1243_Online_Supplement.pdf]

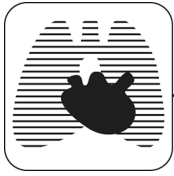

## Airway Hyperresponsiveness in Children With Sickle Cell Anemia

*Joshua J. Field, MD; Janet Stocks, PhD; Fenella J. Kirkham, MD; Carol L. Rosen, MD; Dennis J. Dietzen, PhD; Trisha Semon, MS, CPFT; Jane Kirkby, BSc, ARTP; Pamela Bates, CRT, RPFT; Sinziana Seicean, MD, MPH; Michael R. DeBaun, MD, MPH; Susan Redline, MD; and Robert C. Strunk, MD*

### **e-Appendix 1.**

#### *Institutional review board approval for participating sites*

Washington University School of Medicine, St. Louis, MO: approved by Human Research Protection Office at Washington University, federal wide assurance (FWA) #00000163.

Case Western Reserve, Cleveland, OH: approved by Office of Institutional Review, FWA #00004428.

Institute of Child Health University College, London, UK: approved by Northwick Park Ethics Centre and Brent Research Ethics Committee, FWA #00001221.

#### *Pulmonary function testing*

Spirometry was performed by SAC-certified pulmonary function technicians using a pneumotachograph-type spirometer interfaced with a personal computer system (Jaeger MasterScope, VIASYS, Hoechberg, Germany). Spirometry was performed at least 4 hours after the use of a short-acting bronchodilator.<sup>1</sup> American Thoracic Society (ATS) standards for the performance of spirometry were adapted for children.<sup>1,2</sup> Appropriate prediction equations for FEV<sub>1</sub> and FVC were used taking into account height, age, gender and ethnicity.<sup>3</sup> To measure response to bronchodilator, technicians administered 4 inhalations of albuterol from a metered dose inhaler (90 mcg/puff) using an AeroChamber (Forest Pharmaceuticals, New York, NY) to participants. Spirometry was repeated 15 minutes post-albuterol. Baseline and post-bronchodilator FEV<sub>1</sub> were compared, with percent response to albuterol

*Online supplements are not copyedited prior to posting.*



defined as post-bronchodilator FEV<sub>1</sub> minus pre-bronchodilator FEV<sub>1</sub> divided by pre-bronchodilator FEV<sub>1</sub> times 100. An increase of  $\geq 12\%$  in FEV<sub>1</sub> following albuterol was considered a positive bronchodilator response.<sup>4</sup>

### *Methacholine Airway Challenge*

Methacholine testing and calibration of nebulizers (Airlife Sidestream High-Efficiency Nebulizer, Cardinal Health, Dublin, OH, with a particle size of 1-5 microns, calibrated to deliver 0.13 ml/min) were carried out according to ATS procedures.<sup>5</sup> The two-minute tidal breathing method used by the Childhood Asthma Management Program<sup>6,7</sup> and the Childhood Asthma Research and Education Network was used.<sup>8</sup> FEV<sub>1</sub> was measured following administration of doubling concentrations of methacholine (Provocholine, Methapharm, Coral Springs, FL) starting at 0.195 mg/ml, reaching a maximum dose of 25 mg/ml, or when there was a 20% decrease in FEV<sub>1</sub> post methacholine administration. The procedure was not performed within 1 month after hospitalization for pain or ACS, a course of systemic corticosteroids or symptoms consistent with a respiratory infection, and was performed at least 4 hours after use of a short-acting bronchodilator, 12 hours after the last use of a long-acting bronchodilator and 24 hours after the use of theophylline. A physical examination to preclude any acute exacerbations was undertaken prior to testing. Children with a baseline FEV<sub>1</sub> <70% predicted based on ethnic-specific reference equations<sup>3</sup> did not undergo methacholine challenge. All females who had started menses or were at least 10 years of age had a negative pregnancy test documented within 2 weeks of the testing or at the time of the visit.

### *Method for measurement of methacholine concentration*

To determine if there was a difference in concentration of methacholine at the three participating clinical sites, sample methacholine concentrations were compared from each site. Methacholine concentrations were measured

*Online supplements are not copyedited prior to posting.*



by LC tandem mass spectrometry on an API 3200 system (Applied Biosystems, Foster City, CA) using acetylcholine as an internal standard. Samples were prepared in mobile phase containing 50% acetonitrile, 0.15 mM ammonium acetate, and 0.15 mM ammonium formate (pH 4.0) and injected at a flow rate of 100  $\mu$ L/min. Measurements were made using an electrospray ion source operated at 250°C and 5500 V with curtain gas at 20 psi, nebulizer gas at 30 psi, turbo gas at 5 psi, and collision gas set to medium. Methacholine was monitored using a Q1→Q3 transition of m/z 160→101 and acetylcholine was monitored using an m/z transition of 146→87.

Quantitation was performed using a linear 6 point standard curve over the range of 0.02 to 2 mg/mL with internal standard present at 0.2 mg/mL.

The difference between calculated methacholine concentrations and known sample concentrations were compared. The mean differences in methacholine concentration between calculated and known samples were  $0.13 \pm 0.41$  mg/ml at site 1,  $0.78 \pm 1.21$  mg/ml at site 2 and  $0.31 \pm 0.45$  mg/ml at site 3. Using an ANOVA analysis to compare the mean difference in methacholine concentration between calculated and known values, there was no difference between the three sites ( $p=0.186$ ).

### *Exhaled nitric oxide*

Online exhaled nitric oxide (eNO) using the NIOX system (Aerocrine AB, Stockholm, Sweden) was performed according to ATS guidelines.<sup>10</sup> Measurement of eNO used a resistive device that provided a constant low expiratory flow and vellum closure. Participants were required to exhale to residual volume, place their mouth on a mouthpiece connected to a nitric oxide scrubber and then inhale to total lung capacity. Thereafter, the child exhaled for 10 seconds at a constant flow of 0.05 L/second  $\pm$  10%. Young children were allowed to exhale for 6 seconds. Following a 30-second relaxation period, the exhalations were repeated until 3 eNO values were obtained that varied less than 10%.

*Online supplements are not copyedited prior to posting.*



### *Allergy skin testing*

Allergy skin testing was performed by SAC-certified technicians using Multi-test II (Lincoln Diagnostics, Decatur, IL). In St. Louis and Cleveland, ten aeroallergens (Greer Laboratories, Lenoir, NC) were used for skin testing: dust mite (*Dermatophagoides pteronyssinus* and *D. farinae*), cockroach (American and German), cat (standardized), dog (mixed breeds), *Alternaria alternans*, *Aspergillus fumigatus*, grass (standardized southern mix), tree (eastern 8 tree mix), weed (national mix) and mouse. In London, nine aeroallergens (Alk-Abello, Horsholm, Denmark) were used for skin testing: dust mite (*D. Pteronyssinus*), cockroach (German), cat (*Felix domesticus*), dog (*Canis familiaris*), *Alternaria alternata*, *Aspergillus fumigatus*, grass (6 grass mix), tree (3 tree mix) and Stinging nettle (*Urtica dioica*). All skin tests were administered with histamine (positive) and saline (negative) controls. Wheals present were outlined in ball point pen ink, transferred to tape, and placed on paper as a permanent record. Tests were considered positive when the mean diameter of the wheal was  $\geq 3$  mm compared to the saline control. Children who were receiving anti-histamines did not undergo allergy skin testing.

### *Laboratory testing*

Lactate dehydrogenase (LDH) (Cobas Integra, Roche Diagnostics, Indianapolis, IN) and IgE (Elecsys 2010, Roche Diagnostics, Indianapolis, IN) testing was performed using stored plasma collected in EDTA tubes and stored at  $-80^{\circ}\text{C}$ . To ensure that freeze-thaw did not influence LDH levels, additional LDH measurements were performed on control samples before and after storage at  $-80^{\circ}\text{C}$ . LDH measurements were performed on 10 consecutive plasma samples collected in EDTA tubes from St. Louis Children's Hospital. Plasma samples were prepared using the same methodology as for the SAC samples. Whole blood was collected in EDTA tubes and platelet poor plasma isolated by centrifuging for 10 minutes at 3,000 rpm. After LDH measurements were performed, the samples were frozen at

*Online supplements are not copyedited prior to posting.*



80°C overnight, and then thawed and re-analyzed the next day for LDH level. Spearman rank correlation coefficient between the fresh and frozen/thawed samples was 0.967 ( $p < 0.001$ ). Thus, using our methodology to prepare platelet poor plasma, the free-thaw cycle has little influence on LDH values.

*Relationship between age and AHR in the Childhood Asthma Management Program Trial*

One-thousand thirty-nine children with mild to moderate asthma aged 5-12 years in the Childhood Asthma Management Program Trial underwent methacholine challenge. Tests were performed at randomization when the participants were off all disease modifying medications and free from symptoms of a respiratory viral illness for at least 28 days.<sup>6</sup> There was no linear relationship of  $PC_{20}$  (log transformed) and age using linear regression ( $\beta = -0.004$ ,  $p = 0.82$ ) (Supplementary table 1).

*Sleep Asthma Cohort (SAC) investigative team*

**Washington University, St. Louis, MO:** Michael DeBaun, MD, MPH (Principal Investigator), Robert Strunk, MD (Co-investigator), Joshua Field, MD, Mario Castro, MD, MPH, Ping An, MD, Mark Johnson, MD, Michael Province, PhD, Lisa Garrett, RN, CCRP, Pamela Bates, CRT, RPFT, PRSGT, Rick Talbert, RPSGT, Sabrina Lockett, RPSGT, Valerie Morgan, RRT, Yan Yan, MD, PhD, Avril Adelman, PhD, Phillip Blanks, Tinishia Greene

**Case Western Reserve University, Cleveland, OH:** Susan Redline, MD, MPH (Principal Investigator), Carol Rosen, MD, Susan Surovec, BA, Dan Craven, MD, Nancy Scott, BS, REEG/EPT, RPSGT, REDT, CNIM, Sinziana Seicean, MD, MPH, Mary DeBarr, RN, BSN, Brad Casucci, MA

*Online supplements are not copyedited prior to posting.*



**UCL Institute of Child Health and Great Ormond Street Hospital, London, UK:** Fenella Kirkham, MD, FRCPCH (Principal Investigator), Janet Stocks, PhD, Jane Kirkby, BSc, Satwinder Sahota, BSc, Liam Welsh, PhD, Ursula Johnson, RN, Aidan Lavery, MSc, MBCS, Johanna Dingle-Gavlak, BSc,, Anne Yardumian, MD, FRCP, Olu Wilkey, FRCPCH, Marilyn Roberts-Harewood, MRCPCH, Anne O'Reilly, PhD

**Imperial College, London, UK:** Irene Roberts, MD, FRCPCH, John Warner, MD, FRCPCH

**Hull York Medical School, UK:** Avijit Kumar Datta, MD, MRCP

**Medical College of Wisconsin, Milwaukee, WI:** Kirk Pritchard, PhD (Principal Investigator), Thom Feroah, PhD, Cheryl Hillery, MD, Keith Oldham, MD

**Johns Hopkins University, Baltimore, MD:** James Casella, MD (Principal Investigator)

### References

1. Miller MR, Hankinson J, Brusasco V, et al. Standardisation of spirometry. *Eur Respir J*. 2005;26(2):319-338.
2. Kirkby J, Welsh L, Lum S, et al. The EPICure study: comparison of pediatric spirometry in community and laboratory settings. *Pediatr Pulmonol*. 2008;43(12):1233-1241.
3. Wang X, Dockery DW, Wypij D, Fay ME, Ferris BG Jr. Pulmonary function between 6 and 18 years of age. *Pediatr Pulmonol*. 1993;15(2):75-88.
4. Pellegrino R, Viegi G, Brusasco V, et al. Interpretative strategies for lung function tests. *Eur Respir J*. 2005;26(5):948-968.
5. Crapo RO, Casaburi R, Coates AL, et al. Guidelines for methacholine and exercise challenge testing-1999. This official statement of the American Thoracic Society was adopted by the ATS Board of Directors, July 1999. *Am J Respir Crit Care Med*. 2000;161(1):309-329.
6. Weiss ST, Van Natta ML, Zeiger RS. Relationship between increased airway responsiveness and asthma severity in the childhood asthma management program. *Am J Respir Crit Care Med*. 2000;162(1):50-56.
7. Cherniack R, Adkinson NA, Strunk R, Szeffler S, Tonascia J, Weiss S. The Childhood Asthma Management Program (CAMP): design, rationale, and methods. *Controlled Clinical Trials*. 1999;20:91-120.
8. Strunk RC, Szeffler SJ, Phillips BR, et al. Relationship of exhaled nitric oxide to clinical and inflammatory markers of persistent asthma in children. *J Allergy Clin Immunol*. 2003;112(5):883-892.
9. Knight-Perry JE, Field JJ, Debaun MR, Stocks J, Kirkby J, Strunk RC. Hospital admission for acute painful episode following methacholine challenge in an adolescent with sickle cell disease. *Pediatr Pulmonol*. 2009;44(7):728-730.
10. Recommendations for standardized procedures for the on-line and off-line measurement of exhaled lower respiratory nitric oxide and nasal nitric oxide in adults and children-1999. This official statement of the American Thoracic Society was adopted by the ATS Board of Directors, July 1999. *Am J Respir Crit Care Med*. 1999;160(6):2104-2117.

*Online supplements are not copyedited prior to posting.*

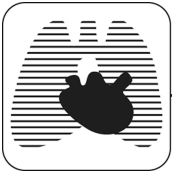

**e-Table 1. Association of age with airway responsiveness (PC<sub>20</sub> mg/ml) among participants in the Childhood Asthma Management Program Trial**

| Age (years) | N   | Median PC <sub>20</sub> | 25 <sup>th</sup> % PC <sub>20</sub> | 75 <sup>th</sup> % PC <sub>20</sub> |
|-------------|-----|-------------------------|-------------------------------------|-------------------------------------|
| 5           | 96  | 1.15                    | 0.52                                | 2.33                                |
| 6           | 139 | 1.02                    | 0.52                                | 2.46                                |
| 7           | 147 | 1.08                    | 0.50                                | 2.96                                |
| 8           | 162 | 1.12                    | 0.61                                | 2.65                                |
| 9           | 146 | 1.09                    | 0.42                                | 2.94                                |
| 10          | 134 | 1.04                    | 0.49                                | 3.19                                |
| 11          | 123 | 1.03                    | 0.36                                | 2.87                                |
| 12          | 92  | 1.06                    | 0.48                                | 2.63                                |

*Online supplements are not copyedited prior to posting.*
